# Supplementary material
Source: PubMed Central journal article supplement (PMC6894078)
Supplement: fj.201900884R.sf1.pdf [file fj.201900884R.sf1.pdf]

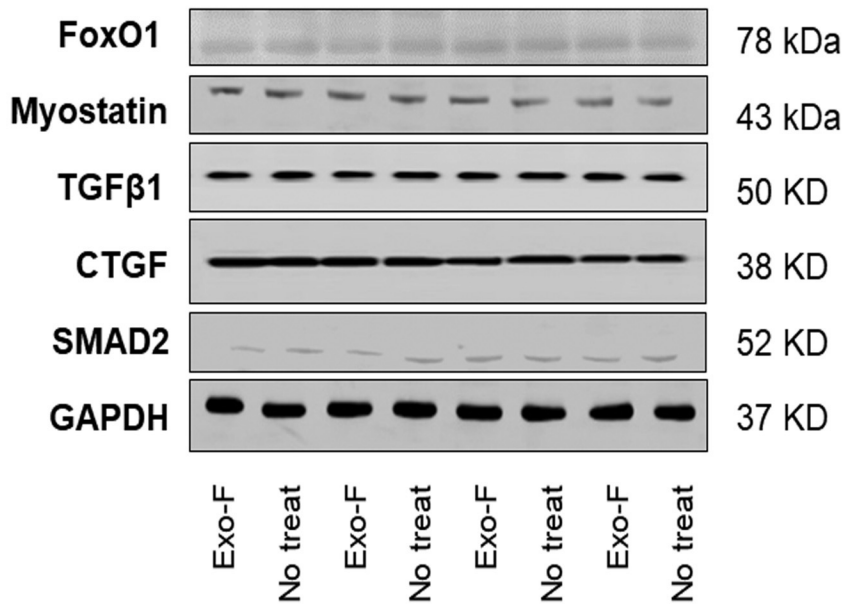

**Supplementary Figures 1: The proteins were isolated from the TA muscle or kidney of mice with intramuscular injected exosome /Flag (Exo/F) for 2-weeks or without treatment (No treat). The proteins FoxO1 (TA), myostatin (TA), TGFβ (kidney), CTGF (kidney) and SMAD2 (kidney) were measured by Western blotting in two groups of mice.**

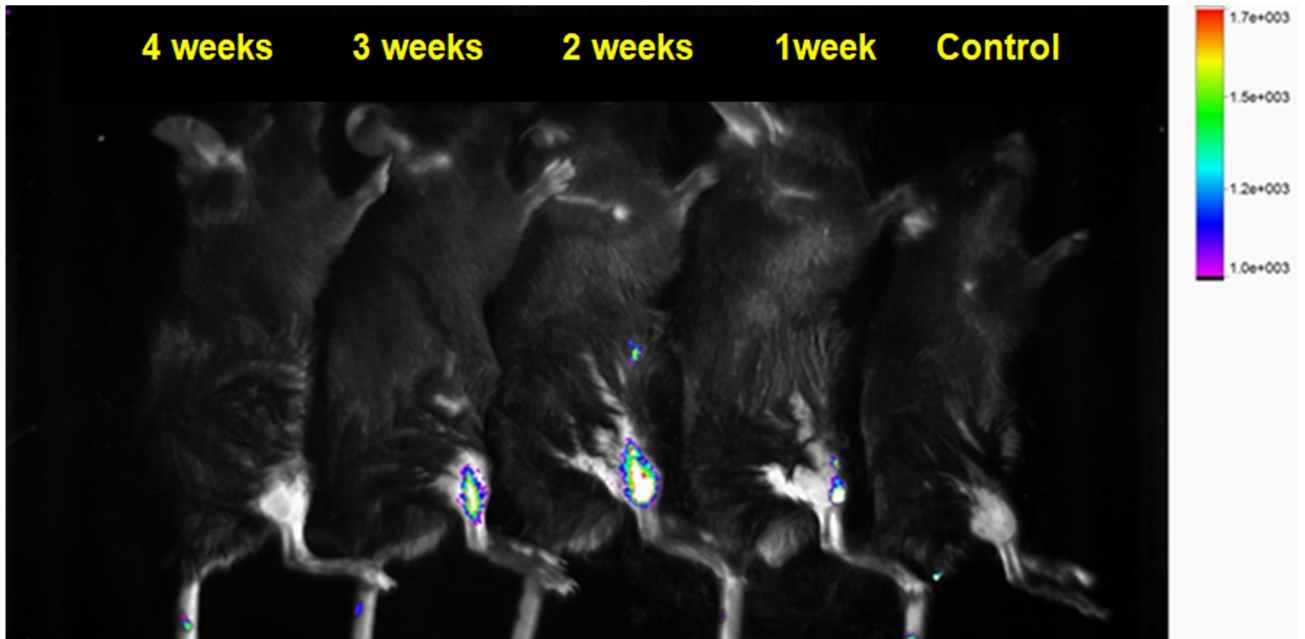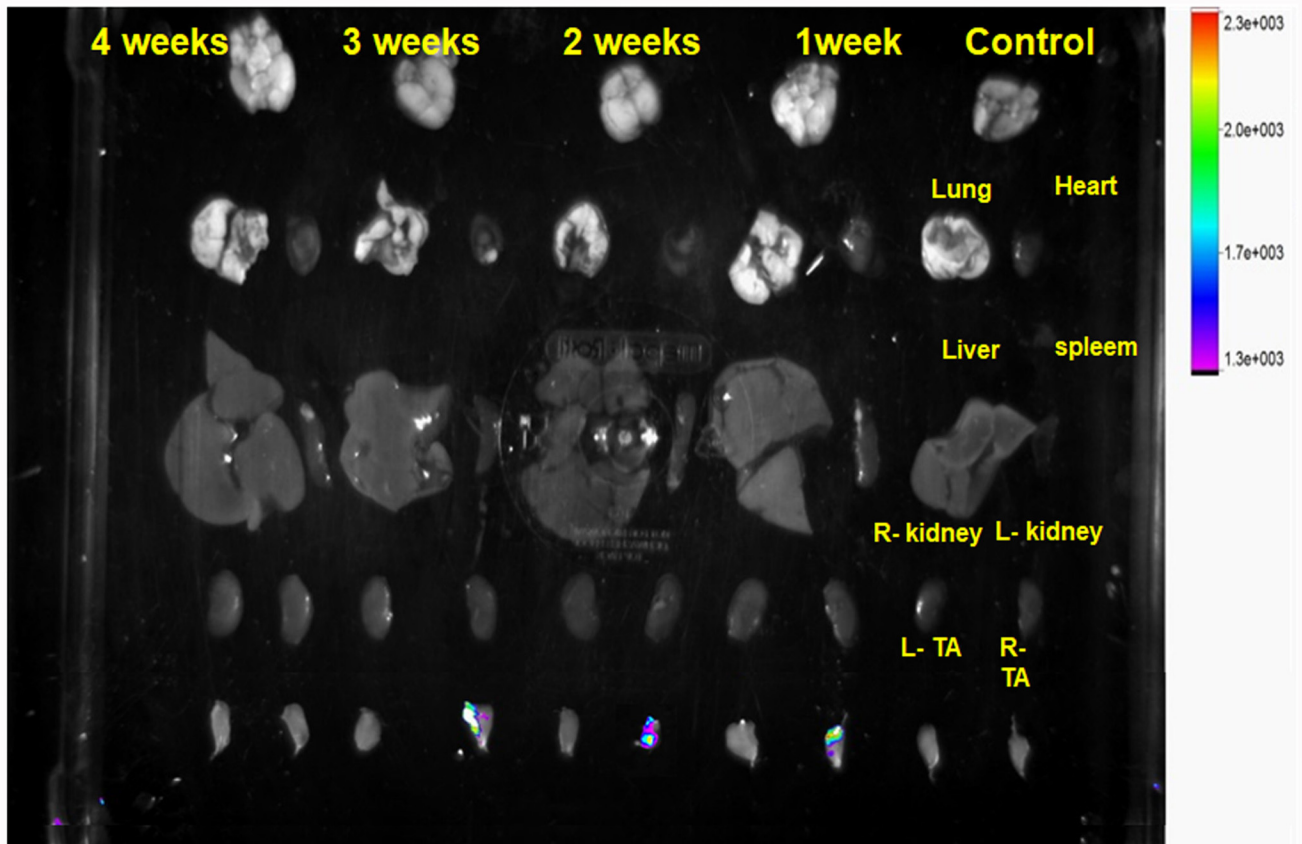

**Supplementary Figures 2:** Mice were injected with 1  $\mu\text{mol/l}$  fluorescent lipophilic tracer DiR without exosome in the left tibialis anterior (TA) muscle. The fluorescence intensity was acquired by a Bruker Small Animal Optical Imaging System at 1, 2, 3 and 4 weeks after injection from whole animals (Top) and organs (Bottom). The control was no DiR injection.
